# Supplementary material for: The causes of stillbirths in south Asia: results from a prospective study in India and Pakistan (PURPOSe)
Source: PubMed Central journal article supplement (PMC9210259; doi:10.1016/s2214-109x(22)00180-2), 2022-06-14
Supplement: mmc1.pdf [file mmc1.pdf]

# THE LANCET

## Global Health

### Supplementary appendix

This appendix formed part of the original submission and has been peer reviewed. We post it as supplied by the authors.

Supplement to: McClure EM, Saleem S, Goudar SS, et al. The causes of stillbirths in south Asia: results from a prospective study in India and Pakistan (PURPOSE). *Lancet Glob Health* 2022; **10**: e970–77.

| Most common pathogens in placental samples and cord blood |                   | Most common pathogens in fetus*                              |                   |
|-----------------------------------------------------------|-------------------|--------------------------------------------------------------|-------------------|
| <b>PCR Results Available, n/N</b>                         | 603/611<br>(98.7) | <b>PCR Results Available, n/N</b>                            | 441/611<br>(72.2) |
| Ureaplasma urealyticum and/or parvum                      | 233 (38.6)        | Ureaplasma urealyticum and/or parvum                         | 27 (6.1)          |
| Escherichia coli and/or Shigella species                  | 79 (13.1)         | Escherichia coli and/or Shigella species                     | 21 (4.8)          |
| Staphylococcus aureus                                     | 47 (7.8)          | Staphylococcus aureus                                        | 8 (1.8)           |
| Candida albicans                                          | 38 (6.3)          | Acinetobacter baumannii                                      | 7 (1.6)           |
| Streptococcus agalactiae (Group B Streptococcus)          | 36 (6.0)          | Parvovirus B19 (human parvovirus)                            | 7 (1.6)           |
| Enterococcus facium                                       | 35 (5.8)          | Streptococcus agalactiae (Group B Streptococcus)             | 6 (1.4)           |
| Klebsiella pneumoniae                                     | 27 (4.5)          | Human cytomegalovirus                                        | 5 (1.1)           |
| Human cytomegalovirus                                     | 20 (3.3)          | One or more species within the Rickettsia genus              | 5 (1.1)           |
| Acinetobacter baumannii                                   | 19 (3.2)          | One or more enterovirus serotypes with the Enterovirus genus | 4 (0.9)           |
| Parvovirus B19 (human parvovirus)                         | 10 (1.7)          | Klebsiella pneumoniae                                        | 4 (0.9)           |

\*Samples include liver, lung (right & left), brain/central nervous system, cerebral spinal fluid, and whole blood.

**Supplemental Table S1. Pathogens identified by TAC PCR**

|                                                                            | Macerated  | Non-macerated |
|----------------------------------------------------------------------------|------------|---------------|
| <b>Stillbirths with cause of death determination, n/N</b>                  | 357/611    | 254/611       |
| <b>Maternal primary cause</b>                                              | 357        | 254           |
| Eclampsia/preeclampsia or other hypertensive disorder, n (%)               | 118 (33.1) | 103 (40.6)    |
| Maternal anemia, n (%)                                                     | 39 (10.9)  | 27 (10.6)     |
| Maternal infectious and parasitic disease, n (%)                           | 22 (6.2)   | 8 (3.1)       |
| Diabetes, n (%)                                                            | 15 (4.2)   | 7 (2.8)       |
| Preterm labor, n (%)                                                       | 2 (0.6)    | 0 (0.0)       |
| Complications of caesarean section, n (%)                                  | 1 (0.3)    | 0 (0.0)       |
| Other maternal complications of pregnancy, n (%)                           | 22 (6.2)   | 16 (6.3)      |
| Other complications of labor and delivery, n (%)                           | 6 (1.7)    | 25 (9.8)      |
| No maternal cause identified, n (%)                                        | 132 (37.0) | 68 (26.8)     |
| <b>Placental primary cause</b>                                             | 357        | 254           |
| Placenta malperfusion, n (%)                                               | 185 (51.8) | 104 (40.9)    |
| Chorioamnionitis and/or funisitis, n (%)                                   | 61 (17.1)  | 27 (10.6)     |
| Placenta previa or abruption, n (%)                                        | 29 (8.1)   | 65 (25.6)     |
| Cord complication, n (%)                                                   | 0 (0.0)    | 1 (0.4)       |
| Other complications of placenta, cord and membranes <sup>2</sup> , n (%)   | 34 (9.5)   | 22 (8.7)      |
| No placental cause identified, n (%)                                       | 48 (13.4)  | 35 (13.8)     |
| <b>Fetal primary cause</b>                                                 | 357        | 254           |
| Intrauterine hypoxia, n (%)                                                | 245 (68.6) | 192 (75.6)    |
| Congenital infections, n (%)                                               | 57 (16.0)  | 21 (8.3)      |
| Congenital malformations, deformations or chromosomal abnormalities, n (%) | 8 (2.2)    | 15 (5.9)      |
| Growth disorders, n (%)                                                    | 10 (2.8)   | 11 (4.3)      |
| Fetal hemorrhage, n (%)                                                    | 2 (0.6)    | 1 (0.4)       |
| Intraventricular hemorrhage of the fetus, n (%)                            | 1 (0.3)    | 0 (0.0)       |
| Hemolytic disease of the fetus, n (%)                                      | 0 (0.0)    | 1 (0.4)       |
| Other, n (%)                                                               | 0 (0.0)    | 1 (0.4)       |
| No fetal cause identified, n (%)                                           | 34 (9.5)   | 12 (4.7)      |

\*Samples include liver, lung (right & left), brain/central nervous system, cerebral spinal fluid, and whole blood.

**Supplemental Table S2. Primary causes of death by maceration status**

## **We thank the PURPOSE Cause of Death Panelists**

| <b><i>Panelist</i></b>  | <b><i>Institution</i></b>                                                                                     |
|-------------------------|---------------------------------------------------------------------------------------------------------------|
| Dr. Saba Tanveer Khan   | Jinnah Postgraduate Medical Centre, Karachi, Pakistan                                                         |
| Dr. Maharukh Hyder      | Jinnah Postgraduate Medical Centre, Karachi, Pakistan                                                         |
| Dr. Sidrah Nausheen     | Aga Khan University, Karachi Pakistan                                                                         |
| Dr. Shazia Masheer      | Aga Khan University, Karachi, Pakistan                                                                        |
| Dr. Atika Sher          | Liaquat National Hospital, Karachi, Pakistan                                                                  |
| Dr. Syeda Nazish Azim   | Liaquat National Hospital, Karachi, Pakistan                                                                  |
| Dr. Shaheen Taq         | Abbasi Shaheed Hospital, Karachi, Pakistan                                                                    |
| Dr. Sumaira Wajid       | National Institute of Child Health, Karachi, Pakistan                                                         |
| Dr. Mehmood Shaikh      | National Institute of Child Health, Karachi, Pakistan                                                         |
| Dr. Mohammed Hanif      | National Institute of Child Health, Karachi, Pakistan                                                         |
| Dr. Yeshita V Pujar     | KLE Academy of Higher Education and Research (Deemed-to-be-University)'s J N Medical College, Belagavi, India |
| Dr. Pralhad Kushtagi    | CAO Durga Sanjeevani Manipal Hospital, Karnataka, India                                                       |
| Dr. Gowri Doriarajan    | Jawaharlal Nehru Institute of Postgraduate Medical Education and Research (JIPMER), Dhanvantari Nagar, India  |
| Dr. Shoba S Kumar       | Tamilnadu Health Systems Project (TNHSP), Tamilnadu, India                                                    |
| Dr. Geetanjali Katageri | S Nijalingappa Medical College, Bagalkot, India                                                               |
| Dr. G Anuradha          | St. John's Medical College and Hospital, Bangalore, India                                                     |
| Dr. Akhila Vasudev      | Kasturba Medical College, Manipal, Karnataka, India                                                           |
| Dr. Philomena Vaz       | Manipal Hospital, Karnataka, India                                                                            |
